# Supplementary figures and images for: Genetic Aberration Analysis in Thai Colorectal Adenoma and Early-Stage Adenocarcinoma Patients by Whole-Exome Sequencing
Source: MDPI journal article supplement (doi:10.3390/cancers11070977), 2019-07-12

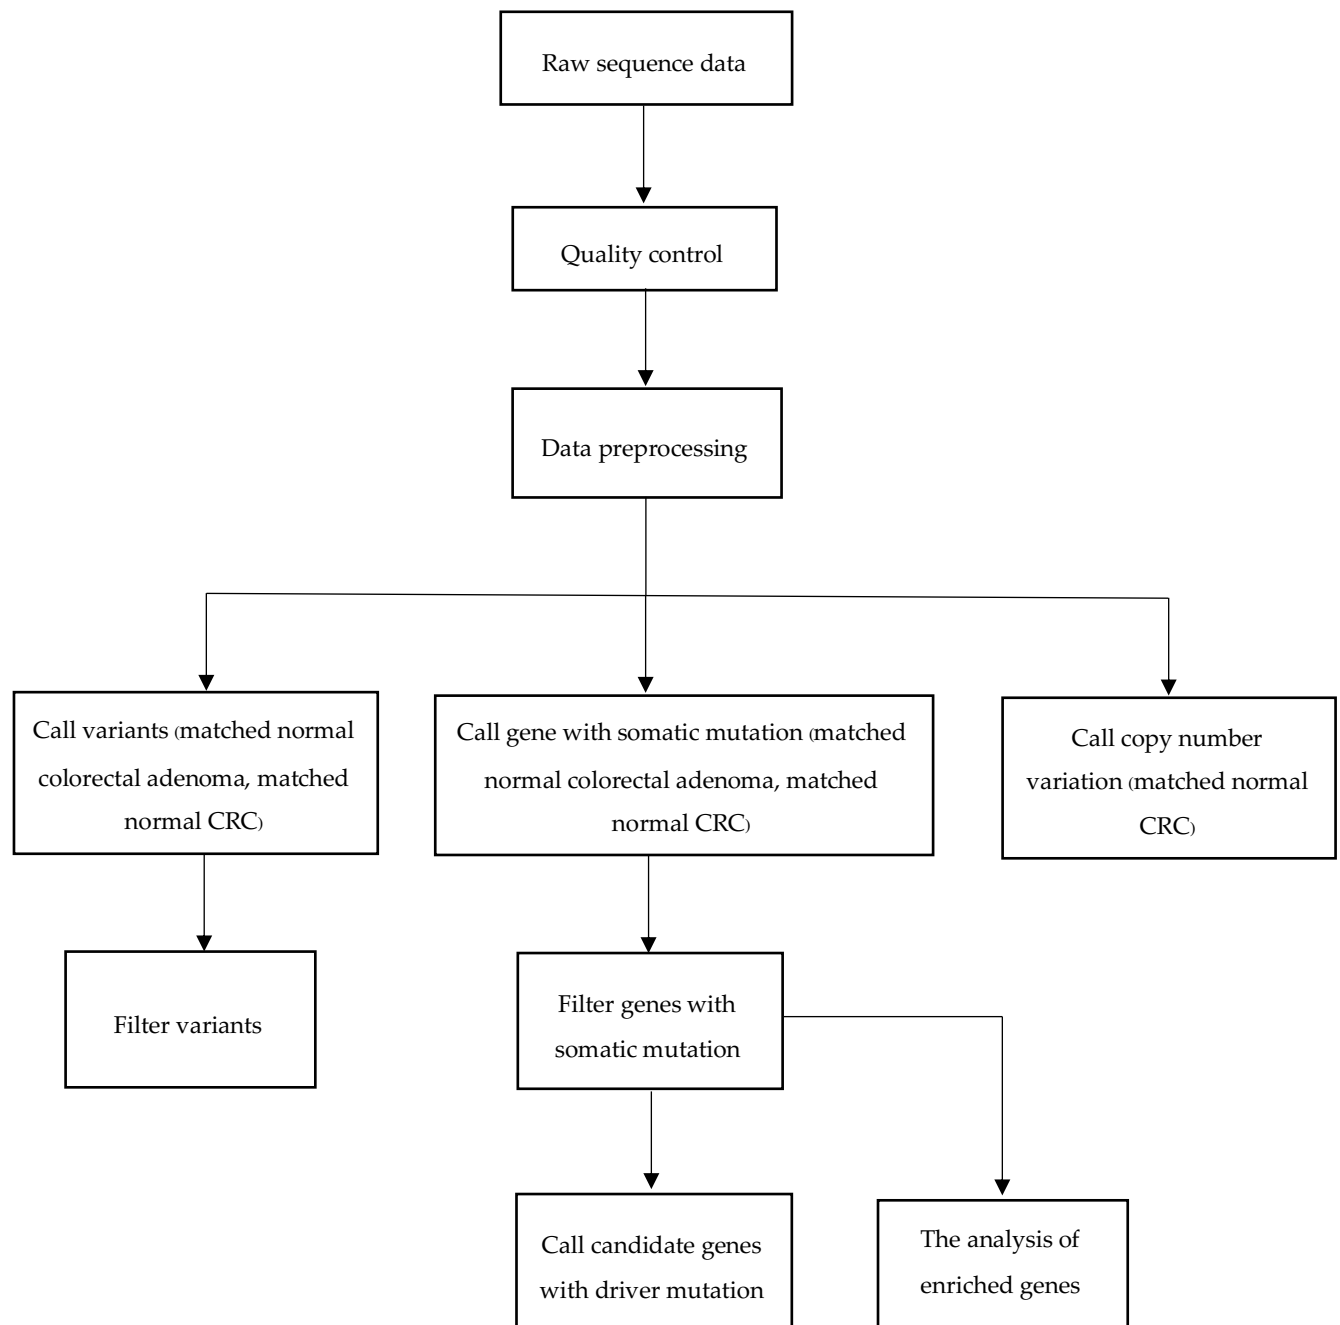

Figure S1: Data flow of the project

Supplement: s1 [file s1]
